# Supplementary material
Source: publisher figshare collection journal article supplement (https://gsajournals.figshare.com/ndownloader/files/14131016)
Supplement: Supplementary file 1 [file 14131016]

**File S3. Python script for *gas-1* interactome SNP simulations reported in Figure S5.**

#!/usr/bin/env python2.7

import re

import sys

import math

f1= open(sys.argv[1], "r")

out1= open("Output_Interactome", "w")

f1.readline()

genedict = dict()

subdict= dict()

for line in f1:

newline= line.strip().split("\t")

#print len(newline)

R07E4_1 = newline[0]

C04E12_10 = newline[1]

daf2 = newline[2]

rheb1 = newline[3]

sel2 = newline[4]

gas1 = newline[5]

nuc_enc = newline[6]

if R07E4_1 != '@':

#print R07E4_1

str_line = str("R07E4_1")

if(genedict.has_key(R07E4_1)):

subdict= genedict[R07E4_1]

if(subdict.has_key(str_line)):

subdict[str_line] += 1

else:

subdict[str_line] = 1

else:

genedict[R07E4_1] = dict()

genedict[R07E4_1][str_line] = 1

if C04E12_10 != '@':

#print C04E12_10

str_line = str("C04E12_10")

if(genedict.has_key(C04E12_10)):

subdict= genedict[C04E12_10]

if(subdict.has_key(str_line)):

subdict[str_line] += 1

else:

subdict[str_line] = 1

else:

genedict[C04E12_10] = dict()

genedict[C04E12_10][str_line] = 1

if daf2 != '@':

#print daf2

str_line = str("daf2")

if(genedict.has_key(daf2)):

subdict= genedict[daf2]

if(subdict.has_key(str_line)):

subdict[str_line] += 1

else:

subdict[str_line] = 1

else:

genedict[daf2] = dict()

genedict[daf2][str_line] = 1

if rheb1 != '@':

#print rheb1

str_line = str("rheb1")

if(genedict.has_key(rheb1)):

subdict= genedict[rheb1]

if(subdict.has_key(str_line)):

subdict[str_line] += 1

else:

subdict[str_line] = 1

else:

genedict[rheb1] = dict()

genedict[rheb1][str_line] = 1

if sel2 != '@':

#print sel2

str_line = str("sel2")

if(genedict.has_key(sel2)):

subdict= genedict[sel2]

if(subdict.has_key(str_line)):

subdict[str_line] += 1

else:

subdict[str_line] = 1

else:

genedict[sel2] = dict()

genedict[sel2][str_line] = 1

if gas1 != '@':

#print gas1

str_line = str("gas1")

if(genedict.has_key(gas1)):

subdict= genedict[gas1]

if(subdict.has_key(str_line)):

subdict[str_line] += 1

else:

subdict[str_line] = 1

else:

genedict[gas1] = dict()

genedict[gas1][str_line] = 1

if nuc_enc != '@':

#print nuc_enc

str_line = str("nuc_enc")

if(genedict.has_key(nuc_enc)):

subdict= genedict[nuc_enc]

if(subdict.has_key(str_line)):

subdict[str_line] += 1

else:

subdict[str_line] = 1

else:

genedict[nuc_enc] = dict()

genedict[nuc_enc][str_line] = 1

key_list = genedict.keys()

#print key_list

values_list = genedict.values()

#print values_list

for key in key_list:

out_str= str(key) + str(genedict[key]) + str("\n")

out1.writelines(out_str)

f1.close()

out1.close()
